# Supplementary material
Source: publisher site journal article supplement (https://www.dovepress.com/article/436176)
Supplement: Supplementary file 1 [file get_supplementary_file.php]

**Supplementary File 1**

***Relative risk reduction (RRR)***

RRR is the absolute risk reduction rate as a proportion of the event rate in the control group. It was calculated with the following equation: RRR = |CER−EER|/CER = ARR/CER, where CER is the event rate in the control group; EER is the event rate in the trial group; and ARR is absolute risk reduction.

***Surgery methods and risk models***

1. LSG: Three surgeons performed all LSG procedures on the enrolled patients using a standardized approach. Patients were first placed in a supine position with their legs spread in an "A" shape, then a pneumoperitoneum was established and a complete separation with a large curve was performed from approximately 3 cm above the pyloric ring to the angle of His. A 36 Fr. Bougie tube is then advanced through the patient's mouth and into their stomach. After the tip of the tube is passed through the pylorus, the gastric tissue is gradually separated with a linear cutting anastomosis from approximately 3 cm above the pylorus to the angle of His and the entire fundus is removed.[1]
2. RYGB：Before the approval for surgical treatment, patients were evaluated via a multidisciplinary team (MDT), including a physician, psychologist, metabolic dietician, and surgeon. RYGB was carried out according to the previously reported method, using 30 cm biliopancreatic limb, 100 cm retrocolic Roux limb, and gastric pouch based on a 30 ml vertical lesser-curve. The hand-sewn method was used to fashion the GJ (gastrojejunostomy) and mesenteric defects were closed via non-absorbable sutures.[2, 3]
3. FRS is a statistical algorithm that uses many risk factors such as age, gender, blood pressure, cholesterol level, smoking history, and diabetes status to evaluate the 10- and 30-year risks of developing CVD events including stroke, coronary heart disease, peripheral arterial disease, or heart failure. [[framinghamheartstudy.org](https://framinghamheartstudy.org/fhs-risk-functions/cardiovascular-disease-10-year-risk/)].[4]
4. The China-PAR project is a specific equation constructed based on a representative sample cohort of Chinese people. Variables include sex, age, residence, HDL cholesterol levels, blood pressure, and use of antihypertensive medication [[cvdrisk.com.cn](https://www.cvdrisk.com.cn/ASCVD/Articles/Index/1)].[5]
5. The WHO risk model utilizes individual participant data sourced from the Emerging Risk Factors Collaboration to predict the risk of developing fatal and non-fatal cardiovascular diseases, including myocardial infarction and stroke, over a 10-year period. The model includes various factors, such as age, smoking habits, blood pressure, diabetic history, and total cholesterol levels.[6]
6. The Globorisk model (laboratory and office-based risk scores and charts) is based on the original laboratory-based predictive model (Globorisk) recalibrated with country-specific average risk factor levels, with the laboratory-based risk scores including age, sex, smoking history, blood pressure, diabetes status, and total cholesterol levels and the non-laboratory (office-based) risk scores in which the diabetes status and total cholesterol levels are replaced with BMI.[7]

Table S1 Introduction to Cardiovascular Disease Risk Assessment Models

| **CVD risk model** | **Factors of inclusion** | **Function** | **Title of citation** | **PMID** |
| --- | --- | --- | --- | --- |
| China-PAR | Age, sex, TC, HDL-c, SBP, smoking, diabetes mellitus, waist circumference, geographic region (south or north), administrative region (urban or rural), family history | 1. year risk of cardiovascular disease   Lifetime risk of cardiovascular disease | Predicting the Ten-Year Risks of Atherosclerotic Cardiovascular Disease in  Chinese Population: the China-PAR Project | 27682885 |
| FRS | Age, sex, TC, HDL-c, SBP, smoking, diabetes mellitus | 10-Year Cardiovascular Risk Based on Laboratory Data and Non-Laboratory Data  30-Year Cardiovascular Risk Based on Laboratory Data and Non-Laboratory Data | General cardiovascular risk profile for use in primary care: the Framingham Heart Study | 18212285 |
| Globorisk | Age, sex, SBP, TC (or BMI), smoking, diabetes, country | 10-Year Cardiovascular Risk Based on Laboratory Data and Non-Laboratory Data | Laboratory-based and office-based risk scores and charts to predict 10-year risk of cardiovascular disease in 182 countries: a pooled analysis of prospective cohorts and health surveys | 28126460 |
| WHO risk model | Age, sex, TC (or BMI), SBP, smoking, diabetes, region | 10-Year Cardiovascular Risk Based on Laboratory Data and Non-Laboratory Data | World Health Organization cardiovascular disease risk charts: revised models to estimate risk in 21 global regions | 31488387 |

**References**

[1] Wang L, Sang Q, Du D, et al. Early Weight Loss after Laparoscopic Sleeve Gastrectomy Predicts Sustained Weight Maintenance Among Chinese Individuals with a BMI < 35 kg/m(2)[J]. Obes Surg, 2021,31(4):1647-1655.

[2] Awad S, Aguilo R, Agrawal S, et al. Outcomes of linear-stapled versus hand-sewn gastrojejunal anastomosis in laparoscopic Roux en-Y gastric bypass[J]. Surg Endosc, 2015,29(8):2278-2283.

[3] Al-Khyatt W, Bull C A, Awad S, et al. Laparoscopic Roux en-Y Gastric Bypass Using a Modified Retrocolic-Supracolic Approach: Outcomes from 300 Patients[J]. World J Surg, 2016,40(8):1918-1924.

[4] D'Agostino R S, Vasan R S, Pencina M J, et al. General cardiovascular risk profile for use in primary care: the Framingham Heart Study[J]. Circulation, 2008,117(6):743-753.

[5] Yang X, Li J, Hu D, et al. Predicting the 10-Year Risks of Atherosclerotic Cardiovascular Disease in Chinese Population: The China-PAR Project (Prediction for ASCVD Risk in China)[J]. Circulation, 2016,134(19):1430-1440.

[6] Kaptoge S, Pennells L, De Bacquer D, et al. World Health Organization cardiovascular disease risk charts: revised models to estimate risk in 21 global regions[J]. The Lancet Global Health, 2019,7(10):e1332-e1345.

[7] Ueda P, Woodward M, Lu Y, et al. Laboratory-based and office-based risk scores and charts to predict 10-year risk of cardiovascular disease in 182 countries: a pooled analysis of prospective cohorts and health surveys[J]. Lancet Diabetes Endocrinol, 2017,5(3):196-213.
